# Supplementary material for: Pervasive Sharing of Genetic Effects in Autoimmune Disease
Source: PubMed Central journal article supplement (PMC3154137; doi:10.1371/journal.pgen.1002254), 2011-08-10
Supplement: pgen.1002254.s002.pdf [file pgen.1002254.s002.pdf]

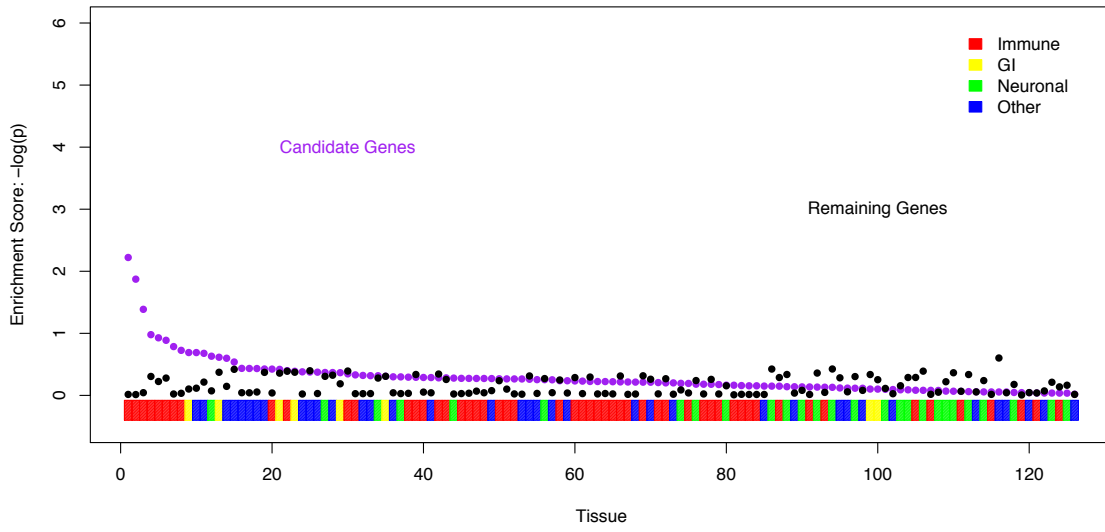

A

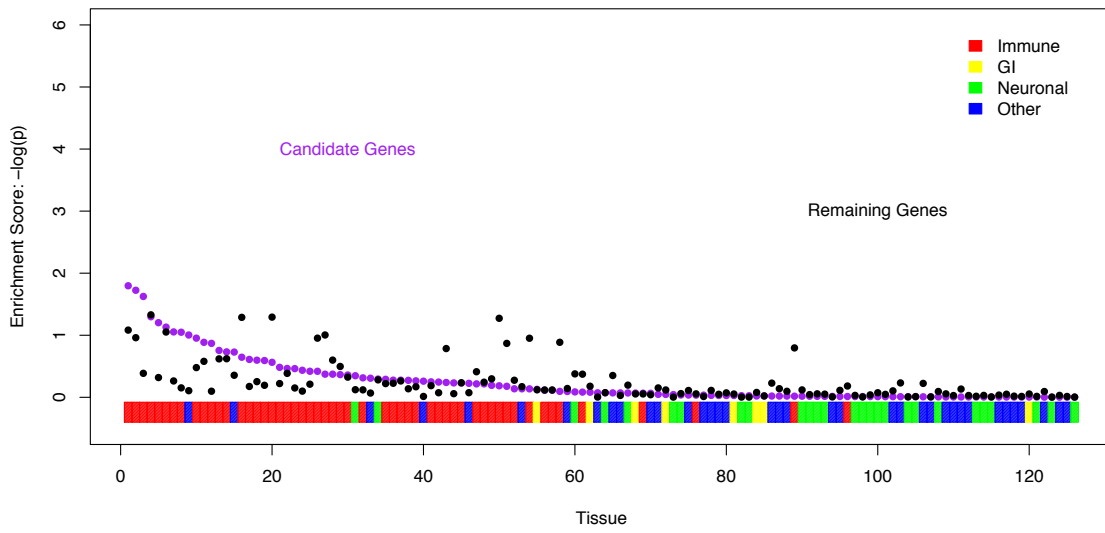

B
